# Supplementary material for: Hydrogen Sulfide Impairs Meiosis Resumption in Xenopus laevis Oocytes
Source: MDPI journal article supplement (doi:10.3390/cells9010237), 2020-01-17
Supplement: s1 [file s1]

## Supplementary Materials

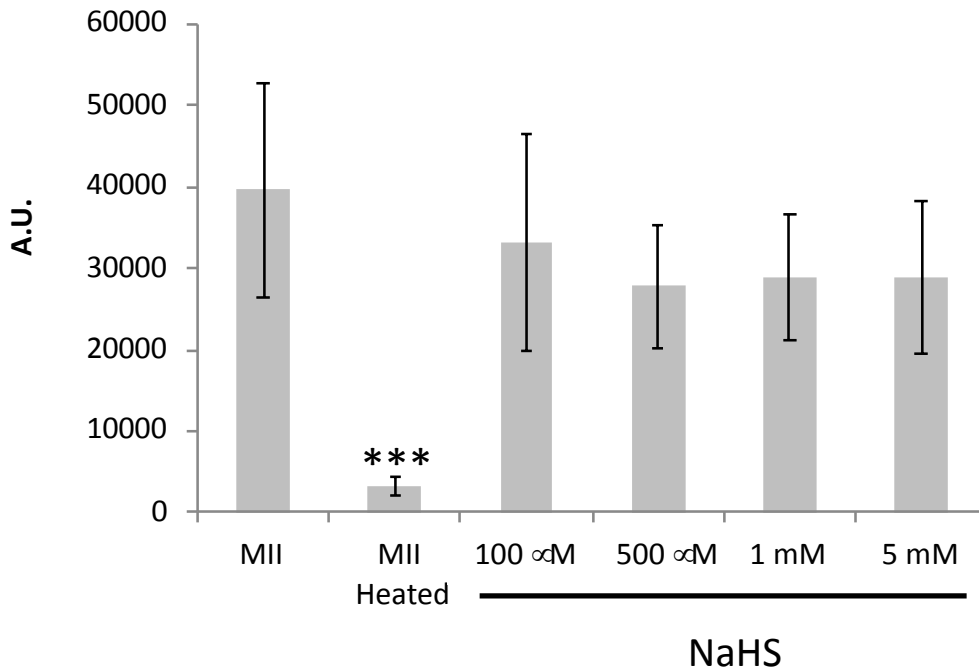

**Figure S1.** NaHS does not modify MAPK activity. MAPK activity was examined by a myelin basic protein (MBP) kinase assay on oocytes exposed to NaHS at 100  $\mu$ M, 500  $\mu$ M, 1 mM and 5 mM. Supernatants from mature oocytes (MII) were heated or not for 30 min at 100  $^{\circ}$ C before they were incubated with p9CKShs1–Sepharose beads (MPF-free) for 1h. Supernatants (5  $\mu$ l) were incubated for 30 min at 30  $^{\circ}$ C with 1 volume of reaction buffer composed by 100 mM 3-[n-morpholino] propanesulfonic acid pH 7.2, 20 mM para-nitrophenyl phosphate, 40 mM  $\beta$ -glycerolphosphate, 20 mM  $MgCl_2$ , 10 mM EGTA, 0.2 mM EDTA, 5  $\mu$ M cAMP-dependent protein kinase inhibitor, 2 mM benzamidine, 40  $\mu$ g/mL leupeptin, 40  $\mu$ g/mL aprotinin, 600  $\mu$ M ATP, added with 3 mg MBP/mL) and 500  $\mu$ Ci/mL [ $\gamma$ - $^{32}$ P]ATP. MAPK activities correspond to the quantification of P-MBP bands on the autoradiography. Statistical significance was accepted for \*\*\*  $p < 0.001$ . N = 3; n = 15.

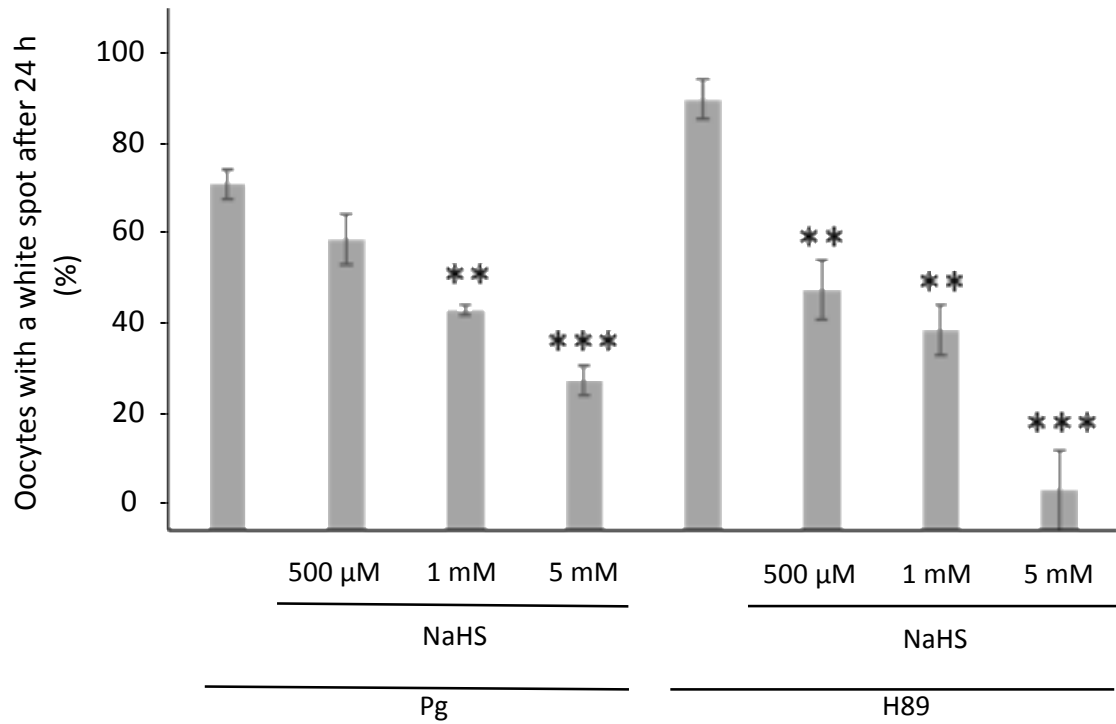

**Figure S2.** NaHS effects on meiosis resumption induced by PKA inhibition. Percentage of oocytes pre-incubated (or not) with NaHS at different concentrations and displaying a white spot 24h after addition of progesterone (4 μg/mL) or H-89 (100 μM). Statistical significance was accepted for \*\* $p < 0.01$  and \*\*\*  $p < 0.001$ . N = 3; n = 15.

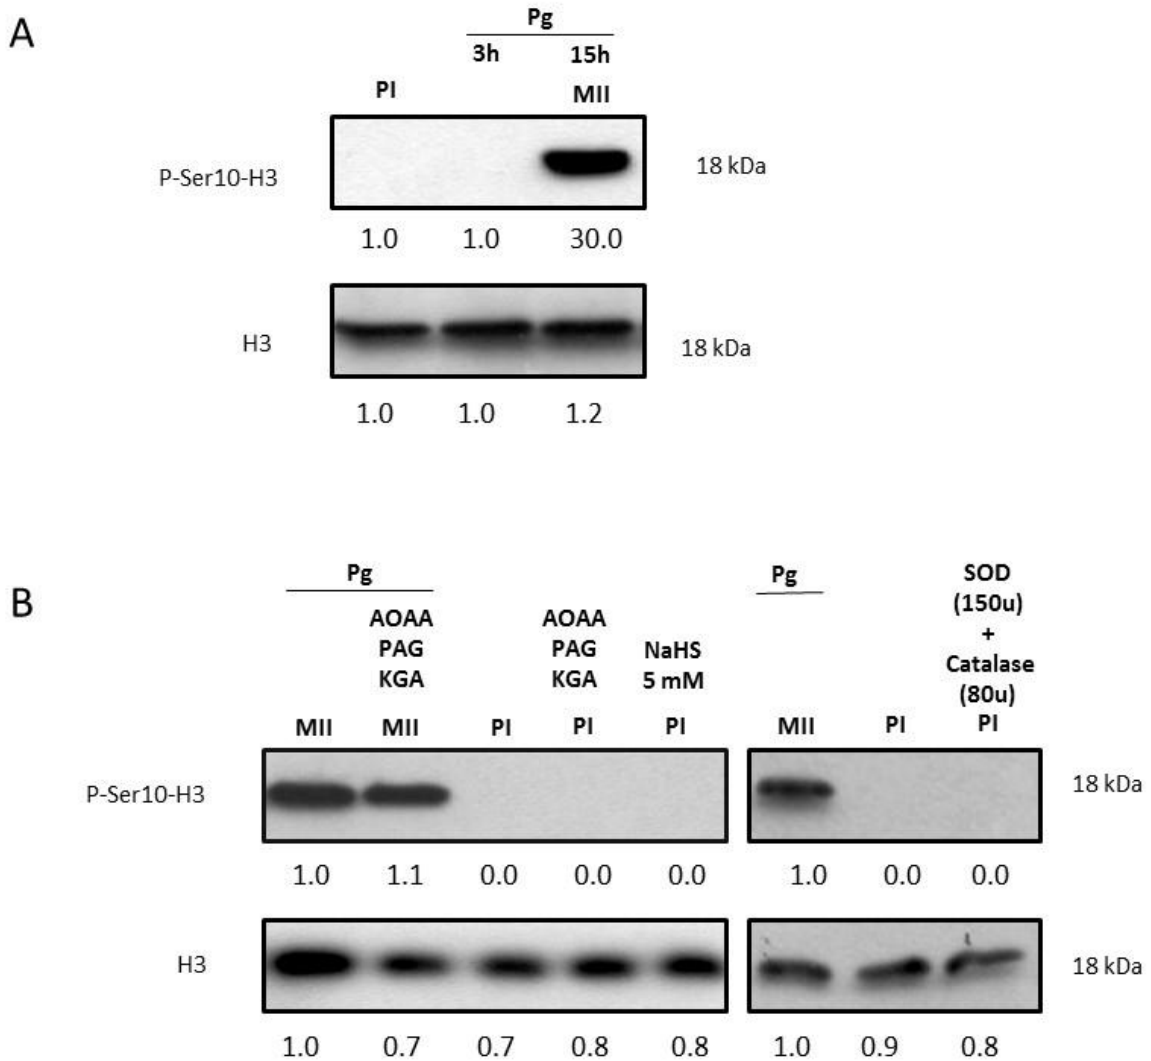

**Figure S3.** Immunoblots of total histone H3 (H3) and phosphorylated histone H3 (P-ser10-H3), A/ in prophase I (PI) oocytes, and in 3 and 15 h progesterone (4  $\mu$ g/mL) treated oocytes (Pg 3 h and Pg 15 h). A pool of ten oocytes was lysed and proteins extracted and submitted to Western blot analysis as described in the materials and methods section. Relative intensity of P-ser10-H3 bands were normalized with the intensity of the loading control total H3 bands and related to the intensity of the control PI oocytes. P-ser10-H3 and H3 bands intensity were determined using Image J software. B/ Immunoblots of total histone H3 (H3) and phosphorylated histone H3 (P-ser10-H3) in metaphase II (MII) and prophase I (PI) oocytes. Oocytes were pre-incubated or not with H<sub>2</sub>S-releasing enzyme inhibitors (AOAA (aminooxyacetic acid-10 mM), PAG (DL-propargylglycine-10  $\mu$ M), and KGA (ketoglutaric acid-10  $\mu$ M)) or with 5 mM of NaHS or with ROS scavengers SOD (150 units) and catalase (80 units) before stimulation or not by progesterone (Pg 4  $\mu$ g/mL). Some oocytes were maintained in the culture medium without or with progesterone (Pg 4  $\mu$ g/mL) treatment alone. After 15h, oocytes were lysed and proteins extracted and submitted to Western blot analysis as described in the materials and methods section. Relative intensity of P-ser10-H3 bands were normalized with the intensity of the loading control total H3 bands and related to the intensity of the control MII treated with progesterone. P-ser10-H3 and H3 bands intensity were determined using Image J software.

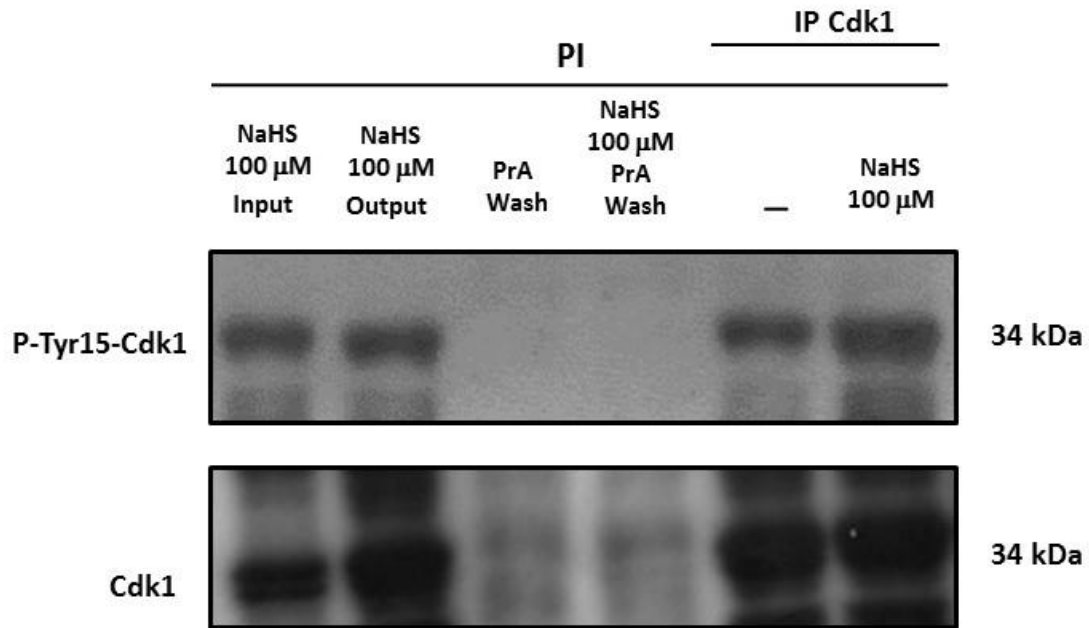

**Figure S4.** Immunoblots of P-Tyr15-Cdk1 and total Cdk1 after Cdk1 immunoprecipitations. Protein extracts from immature oocytes (PI) were treated or not with NaHS at 100  $\mu$ M for 2 h at 4  $^{\circ}$ C and washed with Protein A-Sepharose beads for 1 h at 4  $^{\circ}$ C (PrA wash). The protein extracts were incubated with Cdk1 antibody overnight before they were precipitated with Protein A-Sepharose beads for 1 h at 4  $^{\circ}$ C. Input and output lines correspond to proteins extracts without Cdk1 antibody but respectively before and after Protein A-Sepharose beads incubation. PrA wash lines correspond to proteins fixed on Protein A-Sepharose beads after the first wash of extracts.
